# Supplementary material
Source: Springer Nature journal article supplement (https://www.springermedizin.de/resource/supplementary/12874_2009_422_MOESM1_ESM.pdf/9432054)

DEH11. All Subjects: marginal R-squared

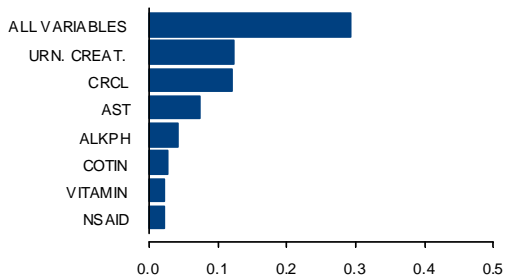

DEH11. All Subjects: delta R-squared

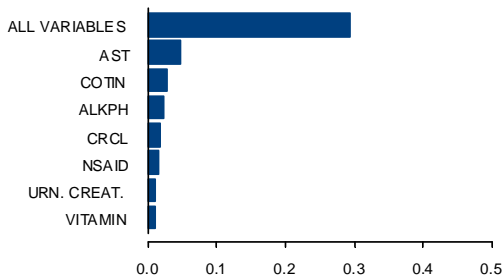

EPI8. All Subjects: marginal R-squared

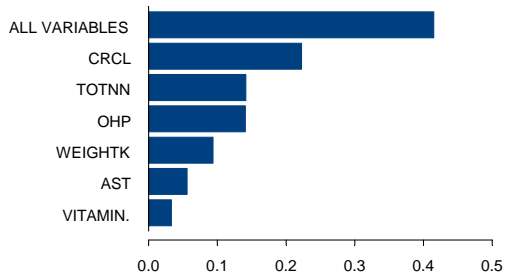

EPI8. All Subjects: delta R-squared

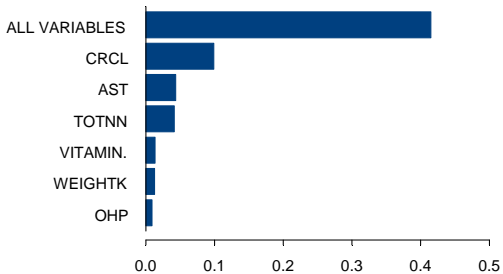

Supplement: MOESM1 [file 9432054]
